# Supplementary material for: The Effect of Cardiac Rehabilitation on Lipid Levels in Patients with Coronary Heart Disease. A Systematic Review and Meta-Analysis
Source: PubMed Central journal article supplement (PMC9717003; doi:10.5334/gh.1170), 2022-11-29

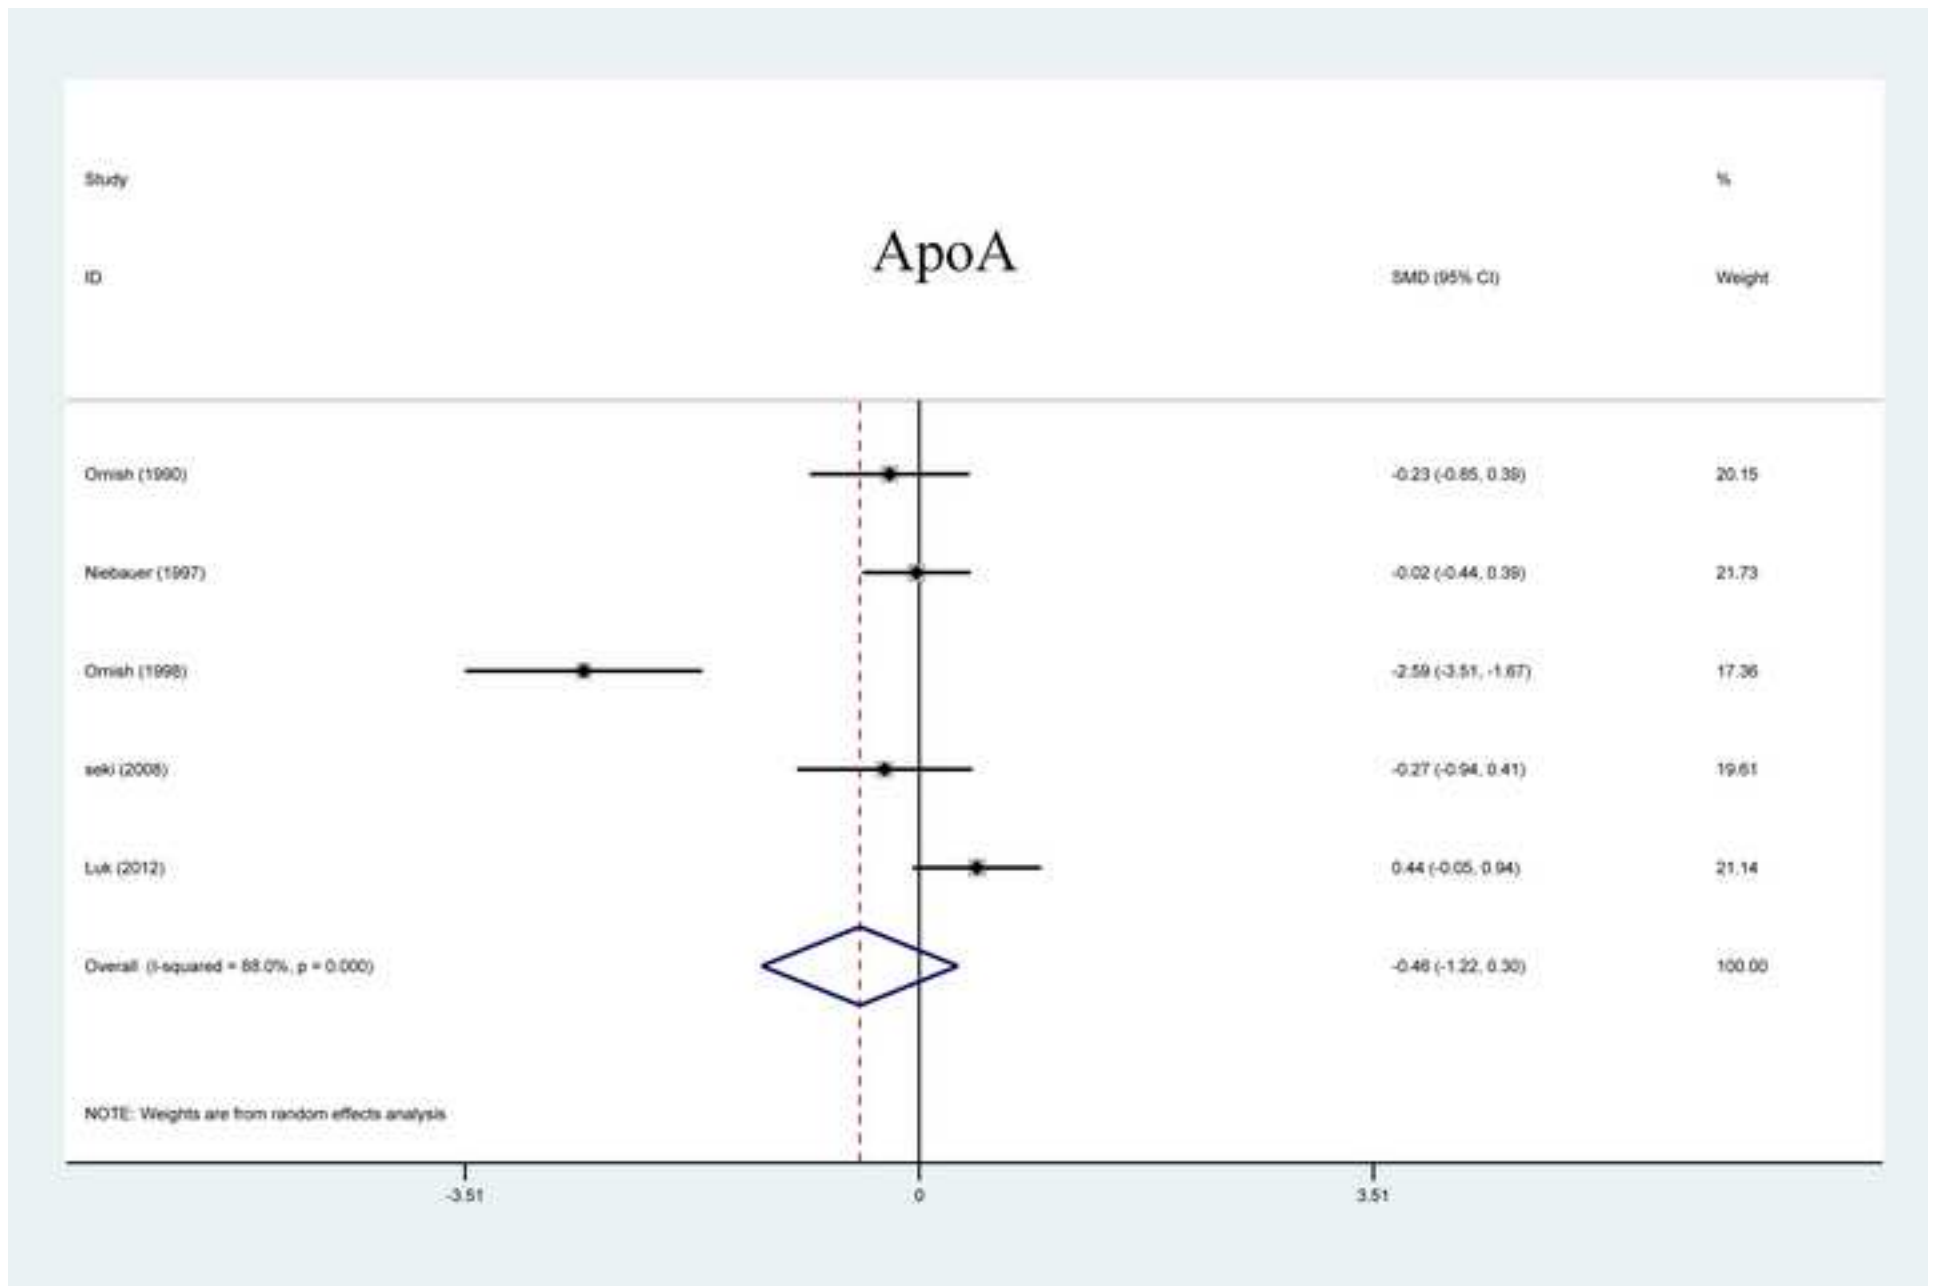

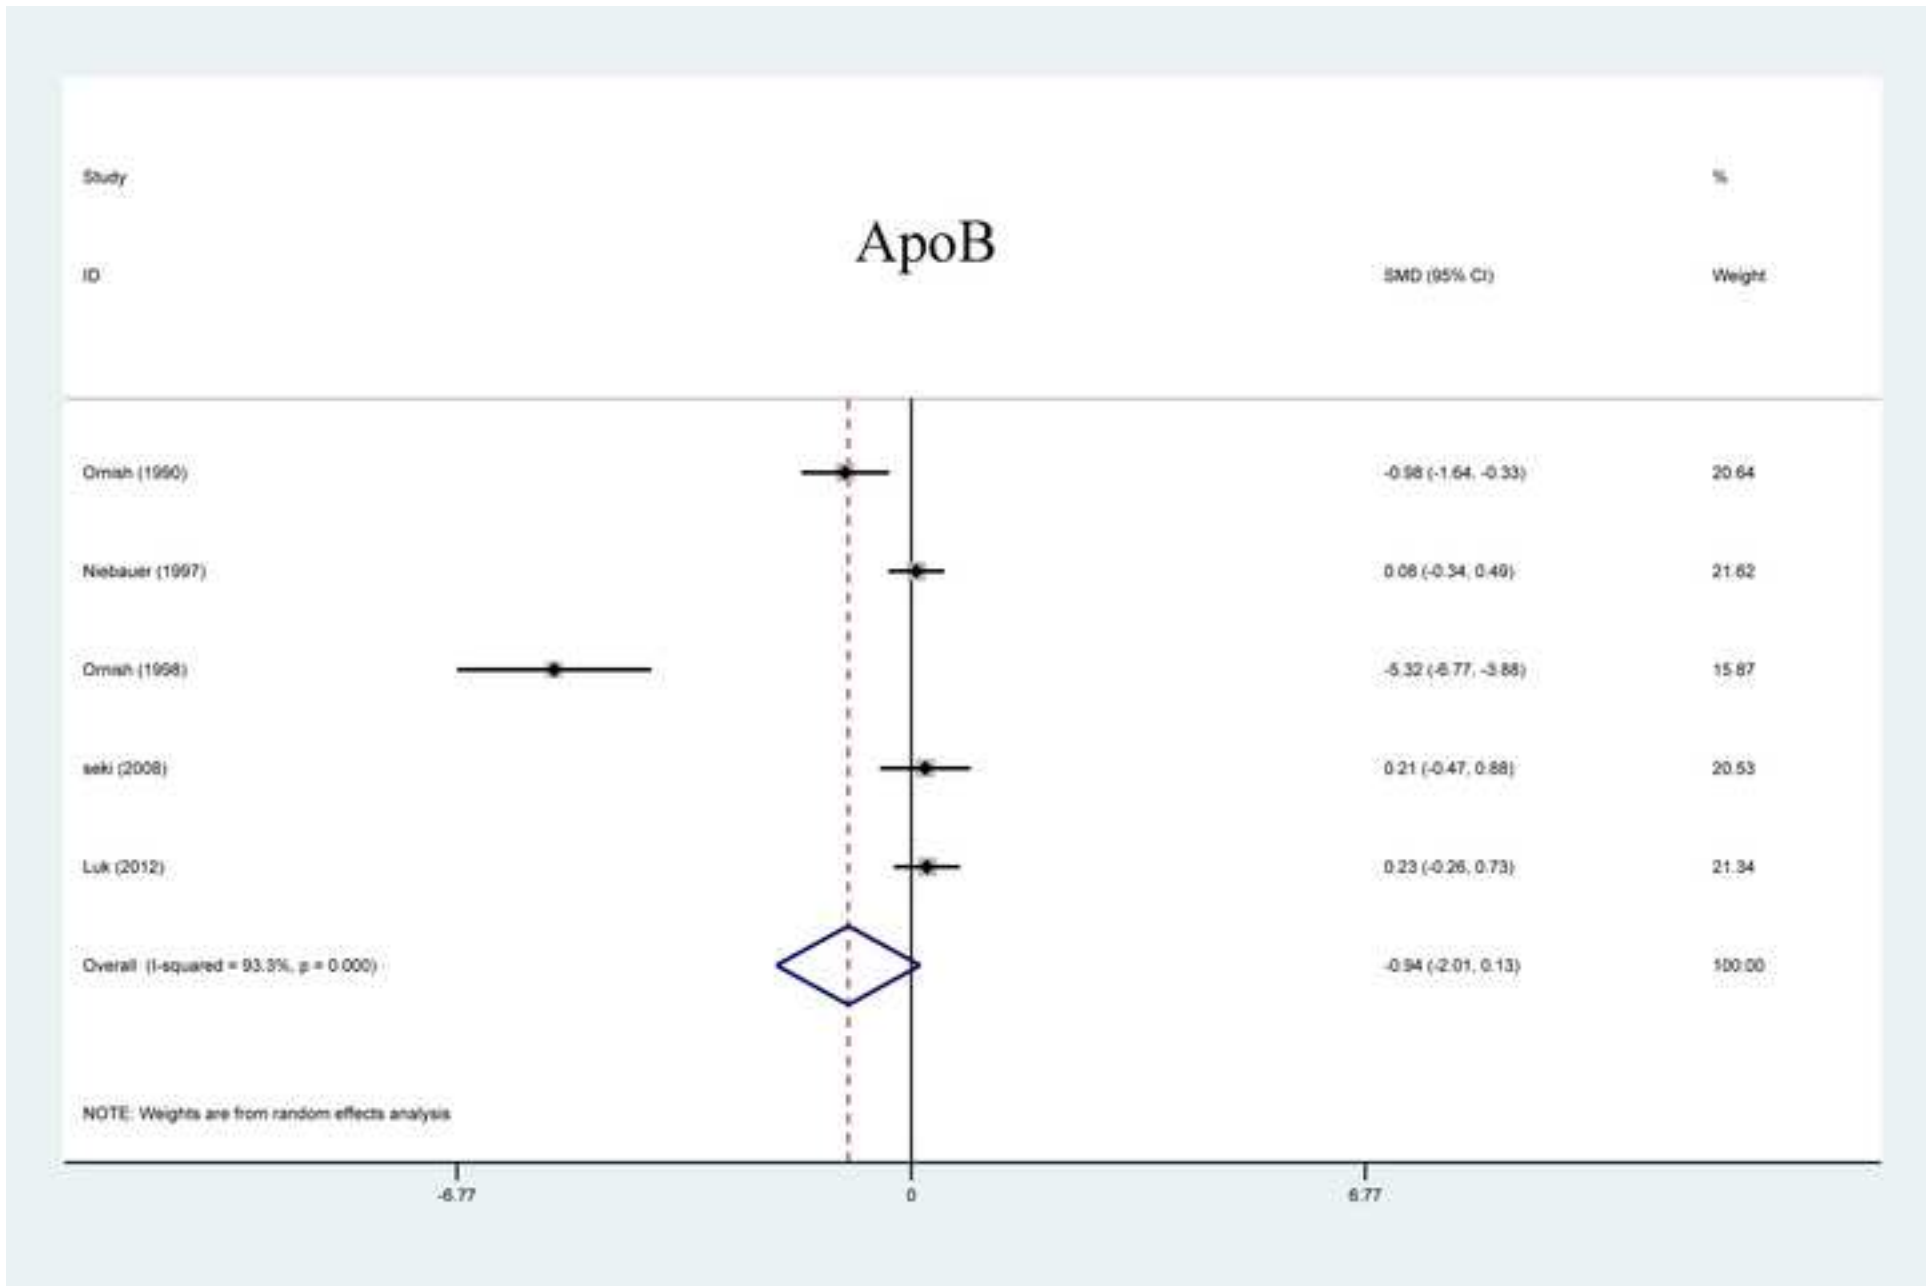

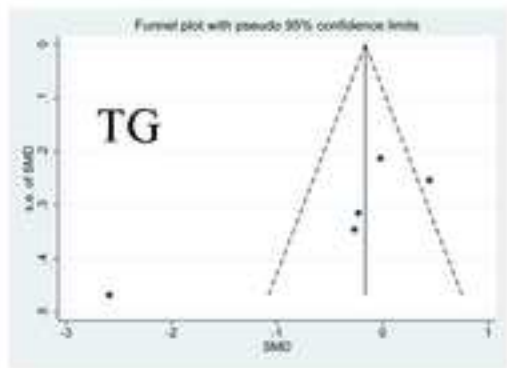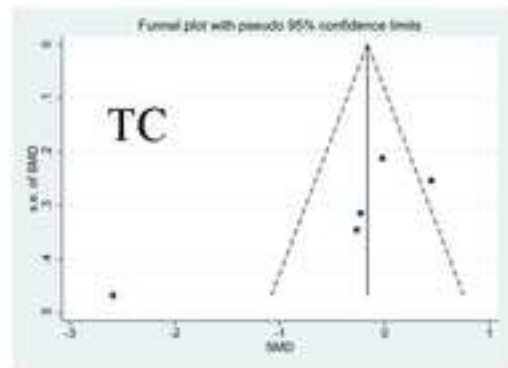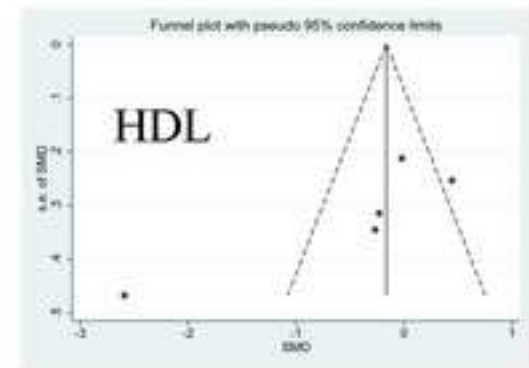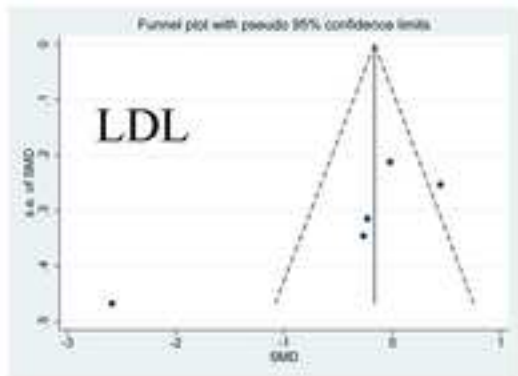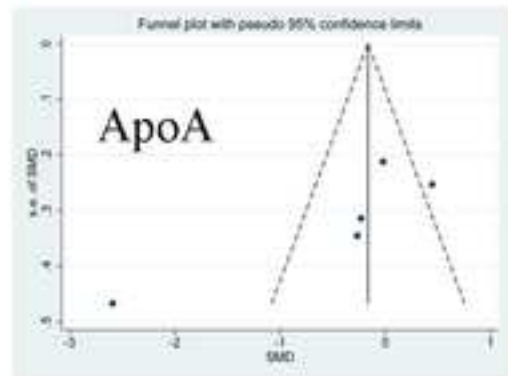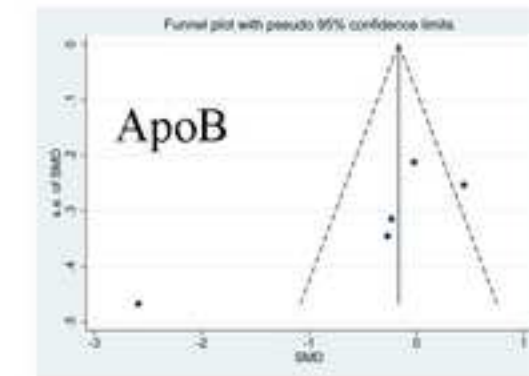

Supplement: gh-17-1-1170-s1.pdf [file gh-17-1-1170-s1.pdf]
