# Supplementary material for: The Effect of Cardiac Rehabilitation on Lipid Levels in Patients with Coronary Heart Disease. A Systematic Review and Meta-Analysis
Source: PubMed Central journal article supplement (PMC9717003; doi:10.5334/gh.1170), 2022-11-29
Supplement: gh-17-1-1170-s2.pdf [file gh-17-1-1170-s2.pdf]

Table S1. Subgroup analysis of ApoA in heterogeneity

| <b>Category</b>            | No. of studies | Heterogeneity statistic | <i>P</i> | I <sup>2</sup> | Tau <sup>2</sup> |
|----------------------------|----------------|-------------------------|----------|----------------|------------------|
| <b>Year</b>                |                |                         |          |                |                  |
| 0 (before 2000)            | 3              | 25.46                   | 0.00     | 92.1%          | 1.161            |
| 1 (2000-2010)              | 2              | 2.76                    | 0.10     | 63.8%          | 0.162            |
| <b>Region</b>              |                |                         |          |                |                  |
| 0 (US and Canada)          | 2              | 17.58                   | 0.00     | 80.6%          | 0.147            |
| 1 (Europe)                 | 1              | 37.31                   | 0.00     | 70.5%          | 0.097            |
| 2 (Asia-Pacific)           | 2              | 35.7                    | 0.00     | 69.2%          | 0.047            |
| <b>No. of intervention</b> |                |                         |          |                |                  |
| 0 (one type)               | 4              | 32.61                   | 0.00     | 90.8%          | 1.081            |
| 1 (two types)              | 1              | 0.00                    | 0.00     | NA             | NA               |
| <b>Quality of studies</b>  |                |                         |          |                |                  |
| 1 (score $\geq 7$ )        | 5              | 33.32                   | 0.00     | 88%            | 0.643            |
| <b>Sample size</b>         |                |                         |          |                |                  |
| 0 (<100)                   | 4              | 32.61                   | 0.00     | 90.8%          | 1.08             |
| 1 ( $\geq 100$ )           | 1              | 0.00                    | 0.00     | NA             | 0.00             |

Table S2. Subgroup analysis of ApoB in heterogeneity

| <b>Category</b>            | No. of studies | Heterogeneity statistic | <i>P</i> | <i>I</i> <sup>2</sup> | Tau <sup>2</sup> |
|----------------------------|----------------|-------------------------|----------|-----------------------|------------------|
| <b>Year</b>                |                |                         |          |                       |                  |
| 0 (before 2000)            | 3              | 52.13                   | 0.00     | 92.1%                 | 1.16             |
| 1 (2000-2010)              | 2              | 0.00                    | 0.95     | 0.00%                 | 0.00             |
| <b>Region</b>              |                |                         |          |                       |                  |
| 0 (US and Canada)          | 2              | 28.69                   | 0.00     | 96.5%                 | 9.09             |
| 1 (Europe)                 | 1              | 0.00                    | 0.00     | NA                    | 0.00             |
| 2 (Asia-Pacific)           | 2              | 0.00                    | 0.95     | 0.00%                 | 0.00             |
| <b>No. of intervention</b> |                |                         |          |                       |                  |
| 0 (one type)               | 4              | 56.99                   | 0.00     | 94.7%                 | 2.29             |
| 1 (two types)              | 1              | 0.00                    | 0.00     | NA                    | 0.00             |
| <b>Quality of studies</b>  |                |                         |          |                       |                  |
| 1 (score ≥7)               | 5              | 57.96                   | 0.00     | 93.3%                 | 1.34             |
| <b>Sample size</b>         |                |                         |          |                       |                  |
| 0 (<100)                   | 4              | 56.99                   | 0.00     | 94.7%                 | 2.29             |
| 1 (≥100)                   | 1              | 0.00                    | 0.00     | NA                    | 0.00             |

Table S3. Subgroup analysis of HDL in heterogeneity

| <b>Subgroup</b>            | No. of studies | Heterogeneity statistic | <i>P</i> | <i>I</i> <sup>2</sup> | Tau <sup>2</sup> |
|----------------------------|----------------|-------------------------|----------|-----------------------|------------------|
| <b>Year</b>                |                |                         |          |                       |                  |
| 0 (before 2000)            | 9              | 15.82                   | 0.07     | 43.1%                 | 0.02             |
| 1 (2000-2010)              | 12             | 13.97                   | 0.38     | 6.9%                  | 0.00             |
| 2 (2010-)                  | 16             | 72.21                   | 0.00     | 77.8%                 | 0.09             |
| <b>Region</b>              |                |                         |          |                       |                  |
| 0 (US and Canada)          | 12             | 20.28                   | 0.06     | 40.8                  | 0.03             |
| 1 (Europe)                 | 10             | 6.43                    | 0.84     | 0%                    | 0                |
| 2 (Asia-Pacific)           | 12             | 76.54                   | 0.00     | 74.9%                 | 0.06             |
| 3 (combination)            | 1              | 0                       | 0.00     | NA                    | 0.00             |
| 4 (Africa)                 | 1              | 0                       | 0.00     | NA                    | 0.00             |
| 5 (South America)          | 1              | 0.51                    | 0.48     | 0                     | 0                |
| <b>No. of intervention</b> |                |                         |          |                       |                  |
| 0 (one type)               | 23             | 80.07                   | 0.00     | 68.8%                 | 0.08             |
| 1(two types)               | 13             | 10.73                   | 0.63     | 0%                    | 0                |
| 2(three types)             | 1              | 0                       | 0.00     | NA                    | 0                |
| <b>Quality of studies</b>  |                |                         |          |                       |                  |
| 0 (score <7)               | 2              | 0.52                    | 0.47     | 0%                    | 0                |
| 1 (score ≥7)               | 35             | 103.66                  | 0.00     | 63.3%                 | 0.05             |
| <b>Sample size</b>         |                |                         |          |                       |                  |
| 0 (<100)                   | 18             | 27.76                   | 0.15     | 24.4%                 | 0.03             |
| 1 (≥100)                   | 19             | 80.48                   | 0.00     | 77.6%                 | 0.06             |

Table S4. Subgroup analysis of LDL in heterogeneity

| <b>Subgroup</b>            | No. of studies | Heterogeneity statistic | <i>P</i> | <i>I</i> <sup>2</sup> | Tau <sup>2</sup> |
|----------------------------|----------------|-------------------------|----------|-----------------------|------------------|
| <b>Year</b>                |                |                         |          |                       |                  |
| 0 (before 2000)            | 11             | 96.79                   | 0.00     | 89.7%                 | 0.32             |
| 1 (2000-2010)              | 13             | 101.75                  | 0.00     | 86.2%                 | 0.31             |
| 2 (2010-)                  | 20             | 97.92                   | 0.00     | 79.6%                 | 0.80             |
| <b>Region</b>              |                |                         |          |                       |                  |
| 0 (US and Canada)          | 12             | 112.52                  | 0.00     | 89.3%                 | 0.32             |
| 1 (Europe)                 | 13             | 111.04                  | 0.00     | 86.5%                 | 0.25             |
| 2 (Asia-Pacific)           | 14             | 109.14                  | 0.00     | 88.1%                 | 0.13             |
| 3 (combination)            | 1              | 0.00                    | 0.00     | NA                    | 0.00             |
| 4 (Africa)                 | 1              | 0.00                    | 0.00     | NA                    | 0.00             |
| 5 (South America)          | 1              | 1.18                    | 0.28     | 15%                   | 0.02             |
| <b>No. of intervention</b> |                |                         |          |                       |                  |
| 0 (one type)               | 23             | 244.73                  | 0.00     | 89.8%                 | 0.34             |
| 1(two types)               | 18             | 152.02                  | 0.00     | 87.5%                 | 0.15             |
| 2(three types)             | 1              | 0                       | 0.00     | NA                    | 0.00             |
| <b>Quality of studies</b>  |                |                         |          |                       |                  |
| 0 (score <7)               | 2              | 5.26                    | 0.02     | 81%                   | 0.18             |
| 1 (score ≥7)               | 40             | 388.03                  | 0.00     | 88.7%                 | 0.21             |
| <b>Sample size</b>         |                |                         |          |                       |                  |
| 0 (<100)                   | 21             | 127.03                  | 0.00     | 81.1%                 | 0.35             |
| 1 (≥100)                   | 21             | 268.44                  | 0.00     | 92.2%                 | 0.19             |

Table S5. Subgroup analysis of total cholesterol in heterogeneity

| <b>Subgroup</b>            | No. of studies | Heterogeneity statistic | <i>P</i> | <i>I</i> <sup>2</sup> | Tau <sup>2</sup> |
|----------------------------|----------------|-------------------------|----------|-----------------------|------------------|
| <b>Year</b>                |                |                         |          |                       |                  |
| 0 (before 2000)            | 12             | 139.28                  | 0.00     | 90.7%                 | 0.27             |
| 1 (2000-2010)              | 13             | 83.77                   | 0.00     | 83.3%                 | 0.26             |
| 2 (2010-)                  | 18             | 64.51                   | 0.00     | 72.1%                 | 0.07             |
| <b>Region</b>              |                |                         |          |                       |                  |
| 0 (US and Canada)          | 12             | 118.67                  | 0.00     | 89.9%                 | 0.33             |
| 1 (Europe)                 | 15             | 98.62                   | 0.00     | 82.8%                 | 0.17             |
| 2 (Asia-Pacific)           | 13             | 47.87                   | 0.00     | 74.9%                 | 0.06             |
| 3 (combination)            | 1              | 0.00                    | 0.00     | NA                    | 0.00             |
| 4 (Africa)                 | 1              | 0.00                    | 0.00     | NA                    | 0.00             |
| 5 (South America)          | 1              | 0.00                    | 0.99     | 0.00                  | 0.00             |
| <b>No. of intervention</b> |                |                         |          |                       |                  |
| 0 (one type)               | 24             | 209.23                  | 0.00     | 87.6%                 | 0.25             |
| 1 (two types)              | 18             | 102.41                  | 0.00     | 81.4%                 | 0.11             |
| 2 (three types)            | 1              | 0.00                    | 0.00     | NA                    | 0.00             |
| <b>Quality of studies</b>  |                |                         |          |                       |                  |
| 0 (score <7)               | 3              | 17.84                   | 0.00     | 88.8%                 | 0.23             |
| 1 (score ≥7)               | 40             | 298.02                  | 0.00     | 85.2%                 | 0.18             |
| <b>Sample size</b>         |                |                         |          |                       |                  |
| 0 (<100)                   | 20             | 106.91                  | 0.00     | 78.5%                 | 0.31             |
| 1 (≥100)                   | 23             | 184.75                  | 0.00     | 87.6%                 | 0.13             |

Table S6. Subgroup analysis of Triglycerides in heterogeneity

| <b>Category</b>            | No. of studies | Heterogeneity statistic | <i>P</i> | <i>I</i> <sup>2</sup> | Tau <sup>2</sup> |
|----------------------------|----------------|-------------------------|----------|-----------------------|------------------|
| <b>Year</b>                |                |                         |          |                       |                  |
| 0 (before 2000)            | 9              | 49.48                   | 0.00     | 81.8%                 | 0.13             |
| 1 (2000-2010)              | 12             | 42.06                   | 0.00     | 69.1%                 | 0.11             |
| 2 (2010-)                  | 15             | 49.35                   | 0.00     | 69.6%                 | 0.06             |
| <b>Region</b>              |                |                         |          |                       |                  |
| 0 (US and Canada)          | 11             | 56.65                   | 0.00     | 80.6%                 | 0.15             |
| 1 (Europe)                 | 10             | 37.31                   | 0.00     | 70.5%                 | 0.10             |
| 2 (Asia-Pacific)           | 12             | 35.7                    | 0.00     | 69.2%                 | 0.05             |
| 3 (combination)            | 1              | 0.00                    | 0.00     | NA                    | 0.00             |
| 4 (Africa)                 | 1              | 0.00                    | 0.00     | NA                    | 0.00             |
| 5 (South America)          | 1              | 0.91                    | 0.34     | 0%                    | 0.00             |
| <b>No. of intervention</b> |                |                         |          |                       |                  |
| 0 (one type)               | 22             | 113.35                  | 0.00     | 78.8%                 | 0.14             |
| 1 (two types)              | 13             | 23.73                   | 0.00     | 87.5%                 | 0.15             |
| 2 (three types)            | 1              | 0.00                    | 0.00     | NA                    | 0.00             |
| <b>Quality of studies</b>  |                |                         |          |                       |                  |
| 0 (score <7)               | 2              | 0.59                    | 0.44     | 0%                    | 0.00             |
| 1 (score ≥7)               | 34             | 146.43                  | 0.00     | 74.7%                 | 0.10             |
| <b>Sample size</b>         |                |                         |          |                       |                  |
| 0 (<100)                   | 18             | 81.49                   | 0.00     | 74.2%                 | 0.24             |
| 1 (≥100)                   | 18             | 64.31                   | 0.00     | 73.6%                 | 0.05             |

|               | Begg's p | Egger's p (95% CI) |
|---------------|----------|--------------------|
| cholesterol   | 0.70     | 0.86 (-1.53, 1.83) |
| Triglycerides | 0.94     | 0.42 (-0.80, 1.88) |
| HDL           | 0.56     | 0.18 (-1.93, 0.36) |
| LDL           | 0.70     | 0.63 (-1.41, 2.03) |
| ApoA          | 0.09     | 0.10 (-19.32,2.94) |
| ApoB          | 0.22     | 0.05 (-18.17,0.09) |

Analysis of publication bias in all including studies

Table  
S7.
